# Supplementary material
Source: PubMed Central journal article supplement (PMC9806780)
Supplement: jcsm.10290.sm001.pdf [file jcsm.10290.sm001.pdf]

**Table S1**— Ordinal Regression for Nightmare Frequency in Youth Sample (N = 680)

| Predictor        | t value | p      | Effect size | Odds ratio | Confidence Interval |       |
|------------------|---------|--------|-------------|------------|---------------------|-------|
|                  |         |        |             |            | Lower               | Upper |
| Age              | 4.6     | <0.001 | 0.18        | 1.39       | 1.21                | 0.60  |
| Sex              | 1.0     | 0.31   | 0.04        | 1.10       | 0.93                | 1.25  |
| Non-White        | -1.8    | 0.07   | -0.07       | 0.89       | 0.78                | 1.01  |
| Mood Disorder    | 1.1     | 0.27   | 0.05        | 1.11       | 0.92                | 1.33  |
| Anxiety Disorder | 0.7     | 0.50   | 0.03        | 1.06       | 0.89                | 1.28  |
| Other Diagnosis  | 1.1     | 0.28   | 0.04        | 1.09       | 0.93                | 1.28  |
| Neuroticism      | 2.5     | 0.01   | 0.11        | 1.21       | 1.04                | 1.41  |
| Openness         | 1.4     | 0.16   | 0.05        | 1.10       | 0.96                | 1.27  |

Data exclude participants who checked off “Prefer not to answer”

**Table S2**— Ordinal Regression for Nightmare Frequency adding Current Stressors in Youth Sample (N = 680)

| Predictor        | t value | p      | Effect size | Odds ratio | Confidence Interval |       |
|------------------|---------|--------|-------------|------------|---------------------|-------|
|                  |         |        |             |            | Lower               | Upper |
| Age              | 4.5     | <0.001 | 0.18        | 1.38       | 1.20                | 1.59  |
| Sex              | 0.6     | 0.55   | 0.02        | 1.05       | 0.90                | 1.21  |
| Non-White        | -1.7    | 0.10   | -0.06       | 0.89       | 0.78                | 1.02  |
| Mood Disorder    | 0.4     | 0.67   | 0.02        | 1.04       | 0.87                | 1.25  |
| Anxiety Disorder | 0.6     | 0.56   | 0.03        | 1.06       | 0.88                | 1.26  |
| Other Diagnosis  | 0.3     | 0.78   | 0.01        | 1.02       | 0.87                | 1.20  |
| Neuroticism      | -1.2    | 0.22   | -0.06       | 0.90       | 0.76                | 1.07  |
| Openness         | 1.5     | 0.13   | 0.06        | 1.11       | 0.97                | 1.27  |
| DASS-21 Total    | 7.3     | <0.001 | 0.35        | 1.88       | 1.59                | 2.23  |

Data exclude participants who checked off “Prefer not to answer”

**Table S3**— Ordinal Regression for Nightmare Frequency adding Current Stressors and COVID Anxiety in Youth Sample (N = 680)

| Predictor             | t value | p      | Effect size | Odds ratio | Confidence Interval |       |
|-----------------------|---------|--------|-------------|------------|---------------------|-------|
|                       |         |        |             |            | Lower               | Upper |
| Age                   | 3.4     | <0.001 | 0.14        | 1.29       | 1.11                | 1.49  |
| Sex                   | 0.03    | 0.97   | 0.001       | 1.00       | 0.87                | 1.16  |
| Non-White             | -1.9    | 0.05   | -0.07       | 0.87       | 0.76                | 1.00  |
| Mood Disorder         | 0.6     | 0.53   | 0.03        | 1.06       | 0.88                | 1.27  |
| Anxiety Disorder      | 0.6     | 0.58   | 0.03        | 1.05       | 0.88                | 1.26  |
| Other Diagnosis       | 0.3     | 0.76   | 0.01        | 1.02       | 0.87                | 1.20  |
| Neuroticism           | -1.3    | 0.19   | -0.06       | 0.89       | 0.75                | 1.06  |
| Openness              | 1.2     | 0.21   | 0.05        | 1.09       | 0.95                | 1.25  |
| DASS-21 Total         | 6.1     | <0.001 | 0.29        | 1.71       | 1.44                | 2.03  |
| COVID-related Anxiety | 4.6     | <0.001 | 0.19        | 1.41       | 1.22                | 1.63  |

Data exclude participants who checked off “Prefer not to answer”

**Table S4**— Ordinal Regression for Nightmare Distress adding Current Stressors and COVID Anxiety in Youth Sample (N = 544)

| Predictor             | t value | p      | Effect size | Odds ratio | Confidence Interval |       |
|-----------------------|---------|--------|-------------|------------|---------------------|-------|
|                       |         |        |             |            | Lower               | Upper |
| Nightmare Frequency   | 8.3     | <0.001 | 0.52        | 2.58       | 2.06                | 3.23  |
| Age                   | 0.1     | 0.92   | 0.004       | 1.00       | 0.85                | 1.19  |
| Sex                   | -1.6    | 0.12   | -0.07       | 0.87       | 0.74                | 1.03  |
| Non-White             | -0.2    | 0.82   | -0.01       | 0.98       | 0.83                | 1.15  |
| Mood Disorder         | 0.4     | 0.67   | 0.02        | 1.04       | 0.85                | 1.28  |
| Anxiety Disorder      | 0.8     | 0.42   | 0.05        | 1.09       | 0.88                | 1.34  |
| Other Diagnosis       | 1.6     | 0.10   | 0.08        | 1.16       | 0.97                | 1.39  |
| Neuroticism           | 0.2     | 0.85   | 0.01        | 1.02       | 0.84                | 1.24  |
| Openness              | -0.3    | 0.79   | -0.01       | 0.98       | 0.83                | 1.15  |
| DASS-21 Total         | 4.2     | <0.001 | 0.23        | 1.51       | 1.25                | 1.84  |
| COVID-related Anxiety | 3.3     | <0.001 | 0.16        | 1.34       | 1.13                | 1.59  |

Data exclude participants who do not experience nightmares and have those who have checked off "Prefer not to answer".
